# Supplementary material for: Metabolic response of the sea cucumber Apostichopus japonicus during the estivation-arousal cycles
Source: Frontiers journal article supplement (doi:10.3389/fmars.2022.980221), 2022-08-08
Supplement: Table_1.XLSX [file Table_1.XLSX]

## Sheet: DA
	DA-Mean	NA-Mean	log2(FC)	raw.pval	VIP
5-L-Glutamyl-L-glutamate	1.09611	3.24447e-05	15.044	1.2506e-09	1.29212
Oleanolic acid	0.877583	3.24447e-05	14.723	1.1909e-10	1.29254
Spermidine	6.95983	0.000271623	14.645	5.318e-07	1.26986
S-Adenosylhomocysteine	0.52436	3.24447e-05	13.98	2.2942e-06	1.28954
L-Cystine	0.265176	3.24447e-05	12.997	0.00012399	1.27336
2R,3R-3-Methylornithinyl-N6-lysine	0.141729	3.24447e-05	12.093	0.0012551	1.22396
Myriocin	4.33299	0.00129486	11.708	0.00012617	1.23037
N1-Acetylspermidine	61.2355	0.0208686	11.519	1.4265e-07	1.28446
delta-Tocotrienol	12.8266	0.00463315	11.435	0.00035826	1.20291
3alpha,7alpha-Dihydroxy-12-oxo-5beta-cholanate	0.392321	0.000162696	11.236	2.1723e-06	1.26252
GMP	0.0763685	3.24447e-05	11.201	0.0001336	1.26546
4a-Carboxy-4b-methyl-5a-cholesta-8,24-dien-3b-ol	1.28179	0.00059098	11.083	3.8568e-05	1.25457
Folic acid	0.36598	0.000280081	10.352	1.5798e-05	1.24867
Galactosylsphingosine	8.59621	0.0105207	9.6743	0.001003	1.16568
UMP	0.546439	0.000934641	9.1914	3.5472e-05	1.24298
Maslinic acid	0.24483	0.000556984	8.7799	0.0007575	1.12629
24-Methylenecholesterol	392.587	0.957972	8.6788	1.4634e-05	1.26365
Ergothioneine	157.899	0.432656	8.5116	7.3686e-06	1.26687
7-Dehydrocholesterol7	67.5347	0.220222	8.2605	3.8546e-06	1.24063
Troxilin B3	0.794666	0.00302934	8.0352	3.9127e-05	1.23039
D-Ribulose 5-phosphate	0.080727	0.000368795	7.7741	4.3171e-05	1.25367
Ribose 1-phosphate	1.23099	0.00566456	7.7636	2.3221e-09	1.28391
5alpha-Ergosta-7,22-diene-3beta,5-diol	2.52377	0.0130557	7.5948	1.2927e-08	1.28225
Palmitoyl-L-carnitine	20.0737	0.108938	7.5257	3.4682e-08	1.27859
2R,3R-3-Methylglutamyl-5-semialdehyde-N6-lysine	0.375553	0.00223662	7.3916	0.00030625	1.19072
Epicatechin	1.41332	0.00926061	7.2538	9.2879e-07	1.27788
dTMP	0.125707	0.000865316	7.1826	0.00068681	1.17815
Alpha-Tocotrienol	14.9224	0.11041	7.0785	1.1338e-10	1.28846
LysoSMd181	3.68308	0.0274977	7.0655	1.1766e-08	1.28524
17-Hydroxyprogesterone	8.65155	0.072743	6.894	3.2769e-06	1.24308
Oleamide	2.20211	0.0208756	6.7209	4.9906e-08	1.27104
Avenasterol	35.4954	0.343062	6.693	2.1721e-05	1.22898
Allopregnanolone	24.0835	0.23505	6.6789	2.0061e-06	1.25482
Beta-Glycerophosphoric acid	2.45975	0.0259287	6.5678	9.6817e-06	1.24719
L-Histidine	4.92275	0.0551773	6.4792	8.8081e-12	1.29045
Propionylcarnitine	30.5637	0.353492	6.434	2.6967e-06	1.26221
L-Lysine	18.8982	0.227538	6.376	3.5558e-07	1.2693
Procaine	111.135	1.34818	6.3651	1.061e-06	1.25317
CMP	0.523529	0.00641799	6.35	0.002992	1.09044
Resolvin D2	0.286247	0.00356235	6.3283	0.0012009	1.08664
Sedoheptulose 7-phosphate	0.428911	0.00555625	6.2704	0.0019205	1.12689
3-AMP	0.932766	0.0122205	6.2541	0.0028678	1.10006
epsilon-gamma-L-Glutamyl-L-lysine	0.349205	0.00526073	6.0527	0.0031043	1.03991
L-Kynurenine	33.0783	0.498633	6.0518	5.4279e-07	1.25612
Docosahexaenoic acid DHA	1.71279	0.0278661	5.9417	0.00036604	1.22649
Niacinamide	84.2064	1.52522	5.7868	5.5551e-10	1.29039
N-Succinyl-L-citrulline	0.344683	0.0062658	5.7816	0.0038117	1.02753
Maltotriose	0.0474409	0.000876229	5.7587	0.00075465	1.12887
L-Glutamic acid	195.967	3.81319	5.6835	9.6184e-06	1.26458
L-Homocysteic acid	4.39133	0.101467	5.4356	0.00019466	1.20818
meso-2,6-Diaminoheptanedioate	34.6682	0.832867	5.3794	2.9948e-05	1.24683
epsilon-Tocopherol	11.6741	0.340292	5.1004	5.3508e-08	1.27233
Butyryl-L-carnitine	2.82863	0.0832007	5.0874	0.001031	1.10769
Catechin	0.483144	0.0153464	4.9765	5.5275e-07	1.26041
beta-Cubebene	0.986496	0.0325292	4.9225	0.00041881	1.14665
L-Malic acid	10.7566	0.405568	4.7291	1.981e-05	1.23565
Resolvin D1	0.531714	0.020239	4.7154	0.0069163	1.01518
Resveratrol	2.00949	0.0770514	4.7049	7.3891e-08	1.28105
Lupeol	6.47043	0.282732	4.5164	0.00078801	1.11568
Cyclopeptine	0.294541	0.013814	4.4143	0.0054795	1.04111
L-Carnitine	77.9905	3.6623	4.4125	6.9935e-05	1.22599
Allyl isothiocyanate	2.46192	0.117521	4.3888	1.6996e-09	1.28661
2-Furancarboxaldehyde	5.35258	0.270566	4.3062	0.0010478	1.22003
4-Nitrocatechol	3.80416	0.224296	4.0841	0.00014051	1.20161
L-Formylkynurenine	2.92906	0.173782	4.0751	0.0010774	1.11685
3-Methoxyanthranilate	39.8199	2.44679	4.0245	0.00021517	1.16082
Sphinganine	59.8242	3.73302	4.0023	9.6201e-06	1.22615
Sphingosine 1-phosphate	0.0768273	0.00497054	3.9501	0.0057847	1.0331
Norethindrone	1.64573	0.119714	3.7811	3.7783e-05	1.19935
Phenylacetylglutamine	0.326252	0.0238844	3.7718	0.011693	1.06558
4-Hydroxy-2-quinolinecarboxylic acid	6.85509	0.509456	3.7501	6.4371e-06	1.2558
Ectoine	385.012	28.995	3.731	4.0901e-07	1.25846
N,N-Dimethylsphingosine	15.8496	1.3796	3.5221	0.00061732	1.13057
N-Acetylmuramate	0.0587904	0.00543116	3.4362	0.0042017	1.0401
L-Arginine	16.7379	1.60416	3.3832	5.775e-05	1.22489
L-Methionine	110.148	11.1318	3.3067	0.00070602	1.12407
5,6-Dihydro-5-fluorouracil	19.7236	2.00856	3.2957	0.00030079	1.14989
Dethiobiotin	4.11754	0.419557	3.2948	0.00021188	1.18573
Oleoylethanolamide	5.24677	0.536054	3.291	0.00060605	1.14433
5S-HpETE	0.56145	0.058158	3.2711	0.0010658	1.0928
Lidocaine	0.359279	0.0376684	3.2537	0.00037253	1.19353
Buprenorphine	0.647132	0.0717091	3.1738	0.0056945	1.02397
Prostaglandin F2a	0.287506	0.0320983	3.163	0.00018289	1.16033
Lenacil	0.830034	0.105375	2.9776	0.0010473	1.20645
Hypoxanthine	10.0924	1.30587	2.9502	0.0018114	1.09275
Thioguanine	1.13705	0.149617	2.9259	2.4374e-08	1.27342
Mechlorethamine	3.55016	0.467908	2.9236	0.00074108	1.12457
Genistein	0.194652	0.0261931	2.8936	5.813e-05	1.19534
2-Hydroxybutyric acid	4.3503	0.585541	2.8933	7.8982e-05	1.18607
Sphingosine	1.78372	0.244112	2.8693	0.00066965	1.15837
Myristic acid	0.398271	0.0607038	2.7139	1.8811e-08	1.27889
4-Pyridoxic acid	1.38943	0.212277	2.7105	0.0021655	1.05377
L-Aspartic acid	1.8685	0.287935	2.6981	3.0218e-05	1.21556
Antibiotic JI-20A	11.8714	1.87733	2.6607	0.0018217	1.07799
Citramalic acid	23.17	3.75191	2.6266	0.00013089	1.16755
Uridin	4.67778	0.759566	2.6226	0.0030215	1.06757
Deoxyuridine	67.5534	10.9852	2.6205	1.9346e-06	1.24121
alpha-Spinasterol	26.6962	4.35763	2.615	0.0035932	1.01194
Phosphorylcholine	4.92498	0.81041	2.6034	0.0027077	1.16997
Diaminopimelic acid	12.8533	2.14907	2.5804	5.3241e-05	1.25017
Fenuron	2.61985	0.442892	2.5645	0.0014573	1.0651
Beta-Tyrosine	4.11675	0.70102	2.554	0.014189	1.05273
Indolebutyric acid	1.18757	0.203392	2.5457	1.1395e-07	1.27157
12-Keto-tetrahydro-leukotriene B4	15.0943	2.62114	2.5257	0.0034301	1.13957
3,4-Dihydroxyphenylpropanoate	4.83295	0.883968	2.4508	0.004096	1.15528
Fenfluramine	0.353956	0.0668006	2.4056	0.00013474	1.16532
3-Ketosphingosine	9.29546	1.84714	2.3312	0.0009761	1.13332
Glycyl-glycine	1.3797	0.280128	2.3002	1.6999e-07	1.26583
Phytosphingosine	40.1474	8.3091	2.2725	0.00011903	1.2275
13,14-Dihydro-15-keto-PGE2	0.703764	0.153138	2.2003	0.00070805	1.12923
4-Hydroxycinnamic acid	4.02925	0.87688	2.2001	0.00056751	1.12319
Pyrimidodiazepine	1.10392	0.247932	2.1546	0.0005047	1.22592
2-Phenylacetamide	30.6279	7.13201	2.1025	0.0012611	1.07652
Aniline	5.47717	1.28875	2.0875	0.00025308	1.21892
9Z,12Z,15Z-Octadecatrienoic acid	0.984646	0.240498	2.0336	0.0011695	1.21133
Indolepyruvate	1.33	0.329906	2.0113	0.00016344	1.22127
Prostaglandin D1	0.299788	0.0746252	2.0062	0.0067602	1.01492
L-Arogenate	0.37104	0.0960612	1.9496	0.0012405	1.17925
3-Dehydrosphinganine	14.5969	3.92238	1.8959	0.0054341	1.02567
Gabapentin	7.03127	2.08469	1.754	0.0069141	1.01127
N-Acetylglutamic acid	0.448634	0.13974	1.6828	2.5608e-07	1.2641
Aminoadipic acid	20.2762	6.32982	1.6796	0.0017122	1.08598
Tetrahydropteridine	3.58877	1.12451	1.6742	0.0021121	1.09457
3-Hydroxyanthranilic acid	10.4886	3.30321	1.6669	0.0013296	1.09588
Styrene Oxide	1.50298	0.489561	1.6183	0.00046363	1.13417
Quinaldic acid	0.83253	0.272209	1.6128	0.0058536	1.10168
L-Allothreonine	2.2025	0.739638	1.5743	0.0027953	1.04596
4-Hydroxybenzaldehyde	11.6683	4.00778	1.5417	0.00083099	1.09713
11-Dehydrocorticosterone	0.336338	0.142749	1.2364	0.0054824	1.04967
9,10-Epoxyoctadecenoic acid	0.716143	1.47372	-1.0411	0.0085796	1.06384
8S-HETE	0.636059	1.3586	-1.0949	0.0058583	1.02862
gamma-Aminobutyric	45.5296	98.0827	-1.1072	0.0011349	1.10968
Sclareol	0.193664	0.459107	-1.2453	0.0025177	1.05322
D-Mannose	0.472804	1.23807	-1.3888	0.0037713	1.03272
Linoleic acid	0.0999414	0.31248	-1.6446	0.013014	1.06926
malate	0.422351	1.50167	-1.8301	0.0093578	1.08017
3,4-Dihydroxymandelic acid	0.397501	1.42106	-1.8379	0.0037438	1.144
Eicosadienoic acid	0.104492	0.373986	-1.8396	0.00068944	1.16655
trans-trans-Muconic acid	3.06714	11.3359	-1.8859	0.0077467	1.05451
Arachidic acid	4.38169	18.1169	-2.0478	5.3132e-06	1.24287
Traumatic Acid	0.670663	2.80512	-2.0644	0.0018507	1.07037
Lumichrome	2.69142	11.5004	-2.0952	0.0012919	1.11062
Oxoglutaric acid	95.7351	417.855	-2.1259	0.0003097	1.25178
Lactate	1.28417	5.63387	-2.1333	5.0446e-05	1.19394
Imidazole-4-acetaldehyde	1.05173	4.63812	-2.1408	0.0056072	1.00332
3-Methylxanthine	0.0180461	0.0800615	-2.1494	0.01005	1.10265
Mannitol	42.6439	197.252	-2.2096	0.00071951	1.19609
Heptanoic acid	0.864856	4.03643	-2.2225	3.8276e-05	1.2444
Pyrrolidonecarboxylic acid	11.0369	51.5207	-2.2228	0.00088304	1.1021
13-L-Hydroperoxylinoleic acid	0.12995	0.60856	-2.2274	0.00019706	1.14568
17a-Estradiol	1.52109	7.20617	-2.2441	0.00046906	1.12719
N-Acetyl-D-glucosamine	0.344822	1.6444	-2.2536	6.0654e-05	1.2195
3-Dehydroshikimate	4.40673	21.0311	-2.2547	2.7965e-06	1.25649
Methyl beta-D-galactoside	0.761254	3.68537	-2.2754	1.6937e-06	1.26098
Maltol	13.2575	65.1249	-2.2964	0.00136	1.1064
Retinol	0.522195	2.5934	-2.3122	0.0008496	1.13366
Alpha-dimorphecolic acid	0.719597	3.63312	-2.3359	0.00013445	1.2346
8,11,14-Eicosatrienoic acid	0.501825	2.54467	-2.3422	0.00039749	1.14599
Oxoadipic acid	6.22814	31.7888	-2.3516	0.00071196	1.10779
3-Sulfinylpyruvic acid	1.69263	8.81428	-2.3806	0.00041115	1.2217
6Z-Octadecenoic acid	2.68041	14.0537	-2.3904	3.0486e-06	1.2422
Trehalose 6-phosphate	0.175285	0.919106	-2.3905	0.00089695	1.16466
Guanidinosuccinic acid	5.03913	26.4733	-2.3933	0.0016784	1.18772
Dehydroepiandrosterone	0.710987	3.75172	-2.3997	0.00011251	1.17278
gamma-Glutamyl-beta-cyanoalanine	1.37048	7.50096	-2.4524	0.00089541	1.13722
Vanillylmandelic acid	1.18733	6.50615	-2.4541	0.0045828	1.07055
myo-Inositol	36.2447	198.727	-2.4549	0.0011805	1.08347
O-Ureido-L-serine	0.304242	1.6761	-2.4618	9.7008e-08	1.27474
Dimethylglycine	17.1201	94.5987	-2.4661	1.189e-06	1.25769
21-Hydroxypregnenolone	3.03124	17.0014	-2.4877	0.00081423	1.17199
Fructose 1,6-bisphosphate	5.71942	32.3895	-2.5016	9.5563e-07	1.25497
Ethirimol	1.39535	8.18067	-2.5516	8.017e-07	1.26961
Hydrogen phosphate	0.268921	1.58965	-2.5635	6.6887e-05	1.21295
Adenine	0.730499	4.32047	-2.5642	0.0042477	1.01997
N,N-Diethyl-m-toluamide	0.117771	0.698437	-2.5681	4.6149e-05	1.25016
Acetylcysteine	0.223966	1.33089	-2.571	0.0031854	1.05969
dAMP	0.328128	1.9529	-2.5733	1.6622e-06	1.26486
Azelaic acid	0.281189	1.67975	-2.5786	7.7328e-05	1.21247
12,13-DHOME	0.249832	1.51994	-2.605	1.325e-06	1.25363
D-Ribose	8.68223	52.8778	-2.6065	0.0082796	1.01396
5-Hydroxyindoleacetic acid	3.14753	19.4067	-2.6243	9.467e-07	1.27206
6beta-Hydroxytestosterone	0.896842	5.55092	-2.6298	1.421e-05	1.22247
Gentisic acid	11.157	69.8563	-2.6464	0.0012661	1.10253
Guanosine-5-triphosphate	0.136682	0.858536	-2.6511	0.0063225	1.1198
17a-Hydroxypregnenolone	0.322652	2.03353	-2.6559	9.4113e-07	1.2632
3-Hydroxymethylglutaric acid	50.0742	324.534	-2.6962	0.00094488	1.20026
13S-hydroxyoctadecadienoic acid	0.336237	2.19821	-2.7088	0.001653	1.20108
Choline	74.6196	499.12	-2.7418	1.4039e-06	1.2625
Oleic acid	91.441	615.25	-2.7503	6.8253e-07	1.25829
2,3-Butanediol	4.33454	29.4228	-2.763	0.0012517	1.07564
5-Aminopentanal	0.432601	2.94921	-2.7692	0.0032825	1.15358
Isovaleric acid	0.500015	3.44682	-2.7852	0.0046761	1.12855
1-Methylxanthine	0.444448	3.16806	-2.8335	0.0045008	1.00006
Capric acid	0.121054	0.887313	-2.8738	6.5851e-05	1.21247
D-Galactose	0.290656	2.14465	-2.8834	0.0013924	1.07178
Acetylcholine chloride	12.6227	94.2999	-2.9012	4.9544e-06	1.26288
Pelargonic acid	0.0427147	0.320815	-2.9089	0.0017232	1.10794
Pyridoxine	0.39164	2.97353	-2.9246	4.6522e-06	1.24045
1,2,3-Trihydroxybenzene	18.1569	141.202	-2.9592	0.0058893	1.08645
4-Quinolinecarboxylic acid	0.234058	1.82618	-2.9639	1.2122e-05	1.25599
Epsilon-caprolactam	1.07155	8.69588	-3.0206	0.0014655	1.07021
Indoleacetaldehyde	7.06417	58.0575	-3.0389	0.0016847	1.19527
Dibutyl phthalate	0.0248057	0.204311	-3.042	0.0028064	1.18573
Cytidine	0.990344	8.29975	-3.0671	3.5658e-06	1.2761
21-Deoxycortisol	0.321817	2.72368	-3.0812	5.7901e-05	1.18842
Daidzin	0.112783	0.982993	-3.1236	0.00038708	1.15676
R-2-O-Sulfolactate	0.366693	3.20667	-3.1284	0.0029257	1.0461
L-Valine	9.85829	86.8047	-3.1384	0.0033874	1.03521
Melatonin	0.356998	3.15349	-3.143	0.00045724	1.22067
4,5-Dihydroorotic acid	1.39529	12.8542	-3.2036	0.00015936	1.20952
Riboflavin	4.05224	37.4593	-3.2085	3.0118e-06	1.24769
Erucic acid	151.1	1398.01	-3.2098	8.1986e-05	1.25621
Pregnanediol	4.22223	39.1889	-3.2144	1.7791e-05	1.2457
Ribose 1,5-bisphosphate	0.210173	2.03434	-3.2749	0.00087219	1.13993
Deoxycholic acid	0.545054	5.33051	-3.2898	1.1777e-07	1.27493
Indican	17.6623	175.273	-3.3109	7.5516e-07	1.25571
Isoliquiritigenin	0.228269	2.30259	-3.3345	0.0012597	1.09203
Taurine	12.6208	131.647	-3.3828	5.2645e-05	1.2378
Cytosine	2.34531	24.5517	-3.388	6.1463e-07	1.26123
Hexadecanedioate	0.111548	1.18303	-3.4067	0.0046776	1.03297
Astragalin	0.131161	1.41949	-3.436	4.965e-05	1.21527
Prostaglandin E1	0.324504	3.68401	-3.505	0.000645	1.11885
S-Adenosylmethionine	1.47672	16.88	-3.5148	3.9216e-07	1.26775
3-2-Hydroxyphenylpropanoic acid	0.117353	1.37911	-3.5548	1.8776e-05	1.22304
Acetylphosphate	4.7936	56.8033	-3.5668	0.002552	1.08809
Stearidonic acid	0.0493953	0.595086	-3.5907	0.0045718	1.04357
D-Glyceraldehyde 3-phosphate	0.382762	4.97348	-3.6997	0.00080702	1.22677
13S-HPOT	0.0673013	0.890615	-3.7261	0.00014999	1.17108
Allocholic acid	0.108807	1.58129	-3.8613	0.003561	1.04402
6-Phosphogluconic acid	0.146255	2.13502	-3.8677	3.4629e-05	1.19881
O-Phosphoethanolamine	0.292891	4.69749	-4.0035	0.0035019	1.06029
Stigmasterol	0.434569	8.27314	-4.2508	6.2424e-05	1.25045
Epiandrosterone	0.09291	1.86439	-4.3267	1.1528e-05	1.24377
all-trans-Retinoic acid	0.0744006	1.76664	-4.5695	0.00041709	1.20658
2-Pyrocatechuic acid	0.0463447	1.17039	-4.6584	7.3993e-05	1.18311
16-Hydroxy hexadecanoic acid	0.0385734	1.00705	-4.7064	0.00046694	1.14455
Formononetin	0.44794	24.9677	-5.8006	0.00041751	1.21434
2-Phenylethanol	0.239511	15.7604	-6.0401	0.0039919	1.03996
Vidarabine	0.03182	2.11216	-6.0526	0.0010542	1.15633
Fucoxanthin	0.0351822	2.36071	-6.0682	0.0021546	1.16291
Phenylethylamine	0.0885473	8.39916	-6.5677	0.0029686	1.09947
Niflumic Acid	0.00191756	0.451964	-7.8808	0.0031975	1.01993
3-Methylbutanamine	0.371959	94.3482	-7.9867	0.0032054	1.06675
