# Supplementary material for: Metabolic response of the sea cucumber Apostichopus japonicus during the estivation-arousal cycles
Source: Frontiers journal article supplement (doi:10.3389/fmars.2022.980221), 2022-08-08
Supplement: Table_2.XLSX [file Table_2.XLSX]

## Sheet: AA VS DA
	FS-Mean	NA-Mean	log2(FC)	raw.pval	vip
5-L-Glutamyl-L-glutamate	10.1222	3.24447e-05	18.251	7.8179e-09	1.30411
S-Adenosylhomocysteine	1.20905	3.24447e-05	15.186	1.2898e-07	1.30386
L-Cystine	0.627808	3.24447e-05	14.24	1.7091e-08	1.30556
2R,3R-3-Methylornithinyl-N6-lysine	0.344114	3.24447e-05	13.373	9.058e-05	1.26244
GMP	0.311688	3.24447e-05	13.23	6.0699e-06	1.2916
Spermidine	0.730214	0.000271623	11.392	7.0931e-06	1.28088
Oleanolic acid	0.0801415	3.24447e-05	11.27	8.2687e-06	1.28911
UMP	1.47533	0.000934641	10.624	3.288e-05	1.27569
3alpha,7alpha-Dihydroxy-12-oxo-5beta-cholanate	0.212809	0.000162696	10.353	4.2245e-06	1.27633
D-Ribulose 5-phosphate	0.301931	0.000368795	9.6772	1.4334e-05	1.28594
4a-Carboxy-4b-methyl-5a-cholesta-8,24-dien-3b-ol	0.355194	0.00059098	9.2313	6.4852e-05	1.26088
Myriocin	0.723855	0.00129486	9.1268	0.00039601	1.22419
Maslinic acid	0.276695	0.000556984	8.9564	0.00012194	1.23154
Troxilin B3	1.10909	0.00302934	8.5162	3.3464e-06	1.28741
delta-Tocotrienol	1.64954	0.00463315	8.4759	0.0011603	1.1722
dTMP	0.281782	0.000865316	8.3471	0.00038048	1.22162
Mefloquine	0.122484	0.000376668	8.3451	2.2122e-05	1.21565
N-Succinyl-L-citrulline	1.99071	0.0062658	8.3116	0.0012179	1.15802
3-AMP	3.48821	0.0122205	8.157	0.0014368	1.16577
Ergothioneine	121.909	0.432656	8.1384	1.9124e-06	1.28034
Epicatechin	2.38599	0.00926061	8.0093	2.7652e-07	1.29738
Folic acid	0.0658646	0.000280081	7.8775	2.9657e-05	1.2207
Ribose 1-phosphate	1.30098	0.00566456	7.8434	2.812e-10	1.30032
L-Lysine	50.6142	0.227538	7.7973	1.7445e-08	1.28761
CMP	1.30783	0.00641799	7.6708	0.0016847	1.14532
L-Kynurenine	98.987	0.498633	7.6331	4.7579e-08	1.27905
Resolvin D2	0.643976	0.00356235	7.498	0.00067092	1.20716
L-Histidine	8.26725	0.0551773	7.2272	4.2003e-08	1.30048
Maltotriose	0.113967	0.000876229	7.0231	0.00035605	1.18646
Sedoheptulose 7-phosphate	0.648282	0.00555625	6.8664	0.0014448	1.16396
2R,3R-3-Methylglutamyl-5-semialdehyde-N6-lysine	0.242721	0.00223662	6.7618	0.00029428	1.17627
Beta-Glycerophosphoric acid	2.50265	0.0259287	6.5928	8.8448e-06	1.26101
N-Acetylmuramate	0.431798	0.00543116	6.313	0.00054315	1.197
Niacinamide	118.037	1.52522	6.2741	3.1237e-13	1.30707
Butyryl-L-carnitine	6.27753	0.0832007	6.2375	0.00043234	1.1687
N1-Acetylspermidine	1.54031	0.0208686	6.2057	7.2014e-09	1.29847
AMP	3.49273	0.052068	6.0678	0.0052325	1.06598
Resolvin D1	1.19295	0.020239	5.8813	0.0032824	1.1093
IMP	0.234277	0.00440803	5.7319	0.0039448	1.10265
Galactosylsphingosine	0.553413	0.0105207	5.7171	0.004736	1.08681
L-Glutamic acid	198.591	3.81319	5.7027	1.2174e-05	1.27989
LysoSMd181	1.40366	0.0274977	5.6737	6.5005e-09	1.29374
2-Furancarboxaldehyde	10.8521	0.270566	5.3258	3.4594e-07	1.29295
Catechin	0.578885	0.0153464	5.2373	9.3112e-07	1.28886
Palmitoyl-L-carnitine	3.91921	0.108938	5.169	3.7293e-08	1.28113
Propionylcarnitine	11.6424	0.353492	5.0416	3.4535e-06	1.24769
L-Carnitine	118.131	3.6623	5.0115	1.0734e-05	1.24782
L-Aspartic acid	8.85402	0.287935	4.9425	1.7251e-07	1.28214
5,6-Dihydro-5-fluorouracil	58.3011	2.00856	4.8593	1.6711e-05	1.22455
L-Homocysteic acid	2.90908	0.101467	4.8415	0.00024626	1.20539
L-Methionine	306.231	11.1318	4.7819	6.7907e-05	1.20776
L-Arginine	43.8232	1.60416	4.7718	3.1733e-06	1.26887
5S-HpETE	1.44956	0.058158	4.6395	0.00019876	1.15856
2-Hydroxybutyric acid	13.5138	0.585541	4.5285	1.383e-06	1.24918
Resveratrol	1.7322	0.0770514	4.4906	1.0845e-05	1.27012
Ectoine	599.246	28.995	4.3693	1.0708e-07	1.27781
Allyl isothiocyanate	2.36649	0.117521	4.3318	3.7182e-06	1.28352
Oleamide	0.410543	0.0208756	4.2976	6.7053e-06	1.26987
Alpha-Tocotrienol	2.06748	0.11041	4.2269	3.1365e-09	1.29674
L-Formylkynurenine	3.1653	0.173782	4.187	1.9183e-05	1.21285
Prostaglandin F2a	0.578312	0.0320983	4.1713	4.6637e-05	1.19466
Aminosalicylic Acid	10.1851	0.56913	4.1616	0.00019294	1.23235
Procaine	23.1016	1.34818	4.0989	7.5635e-05	1.23693
Beta-Tyrosine	11.3105	0.70102	4.0121	0.0016392	1.13936
5alpha-Ergosta-7,22-diene-3beta,5-diol	0.207519	0.0130557	3.9905	2.9166e-05	1.21845
Cyclopeptine	0.213054	0.013814	3.947	0.0072982	1.02161
L-Malic acid	5.99885	0.405568	3.8867	3.6167e-05	1.21577
2-Hydroxyphenethylamine	671.373	45.9765	3.8681	0.0067713	1.03535
Avenasterol	4.95534	0.343062	3.8524	5.6257e-05	1.23028
Glycyl-glycine	4.04359	0.280128	3.8515	3.4151e-08	1.28816
3,4-Dihydroxyphenylpropanoate	12.7593	0.883968	3.8514	0.00013936	1.24381
Norethindrone	1.59279	0.119714	3.7339	3.4796e-05	1.22864
L-Tyrosine	309.235	23.3655	3.7262	0.002108	1.08786
meso-2,6-Diaminoheptanedioate	10.8963	0.832867	3.7096	2.8701e-07	1.27303
4-Pyridoxic acid	2.6503	0.212277	3.6421	0.00050974	1.17889
4-Hydroxycinnamic acid	10.4969	0.87688	3.5814	6.5578e-05	1.17879
4-Nitrocatechol	2.6725	0.224296	3.5747	0.00019647	1.18862
Aniline	15.2193	1.28875	3.5619	4.5491e-05	1.25302
Indolebutyric acid	2.33453	0.203392	3.5208	9.3226e-08	1.2882
Glycerophosphocholine	2.54426	0.234577	3.4391	0.0005445	1.10671
Genistein	0.271269	0.0261931	3.3725	1.5743e-05	1.23527
Hypoxanthine	12.5876	1.30587	3.2689	0.0016898	1.15455
Tetrahydropteridine	10.6931	1.12451	3.2493	0.00010512	1.20693
2-Phenylacetamide	67.5097	7.13201	3.2427	9.3954e-05	1.16577
beta-Cubebene	0.297829	0.0325292	3.1947	0.0030937	1.07108
8-Hydroxyquinoline	7.77484	0.863718	3.1702	0.0011326	1.09261
L-Glutamine	8.39039	0.966287	3.1182	0.0019163	1.09192
Quinaldic acid	2.3437	0.272209	3.106	0.00024858	1.21326
L-Allothreonine	6.33331	0.739638	3.0981	4.5812e-05	1.21838
Gabapentin	17.6249	2.08469	3.0797	0.00078687	1.17973
Indolepyruvate	2.77445	0.329906	3.0721	1.882e-05	1.25644
Histamine	23.8755	2.91019	3.0363	0.00021396	1.20957
Styrene Oxide	3.99665	0.489561	3.0292	9.5664e-05	1.20448
4-Hydroxybenzaldehyde	28.0835	4.00778	2.8088	0.00014092	1.17191
L-Leucine	1473.2	219.579	2.7461	0.00073829	1.12526
Avermectin B1b aglycone	0.624352	0.0965196	2.6935	0.0093689	1.01332
Antibiotic JI-20A	12.1218	1.87733	2.6909	0.0017896	1.12449
Phenylacetylglutamine	0.151194	0.0238844	2.6623	0.0043759	1.05638
Xanthine	2.95366	0.49935	2.5644	0.004734	1.06207
Diaminopimelic acid	12.2793	2.14907	2.5144	8.3632e-05	1.23722
para-Phenylenediamine	5.31881	0.935035	2.508	0.0028984	1.1046
3-Hydroxyanthranilic acid	18.6316	3.30321	2.4958	0.00016533	1.21901
Deoxyuridine	61.5349	10.9852	2.4858	0.00026352	1.17241
Thioguanine	0.824529	0.149617	2.4623	7.636e-07	1.26422
Prostaglandin D1	0.399823	0.0746252	2.4216	0.0036098	1.09526
Paxilline	0.281745	0.0527056	2.4184	0.002103	1.04773
Phosphorylcholine	4.25762	0.81041	2.3933	0.00032032	1.20126
epsilon-Tocopherol	1.74384	0.340292	2.3574	1.6854e-05	1.22076
Uridine	3.87625	0.759566	2.3514	0.0051171	1.07774
Cis-zeatin	2.839	0.565533	2.3277	0.0012055	1.08795
2S,5S-trans-Carboxymethylproline	11.0929	2.30951	2.264	0.0016675	1.08351
9Z,12Z,15Z-Octadecatrienoic acid	1.11355	0.240498	2.2111	1.8881e-06	1.28019
12-Keto-leukotriene B4	2.40841	0.52138	2.2077	0.00039045	1.16519
16R-HETE	9.70981	2.2467	2.1116	4.2102e-05	1.19273
R-4-Hydroxymandelate	1.94393	0.451482	2.1062	0.00010175	1.17822
13,14-Dihydro-15-keto-PGE2	0.632106	0.153138	2.0453	0.00023547	1.19878
Mechlorethamine	1.92739	0.467908	2.0423	0.0042602	1.0598
Dethiobiotin	1.68535	0.419557	2.0061	0.0025045	1.11456
Lenacil	0.405275	0.105375	1.9434	3.3952e-06	1.25445
8,11,14-Eicosatrienoic acid	9.36121	2.54467	1.8792	0.00074098	1.08346
L-Asparagine	2.03034	0.569625	1.8336	0.0013871	1.0707
4-Hydroxy-2-quinolinecarboxylic acid	1.77456	0.509456	1.8004	0.00054612	1.14387
Fenfluramine	0.219284	0.0668006	1.7149	0.0006562	1.14698
Estradiol	3.04007	0.999774	1.6044	0.00045004	1.11797
Hydroxykynurenine	0.451761	0.159278	1.504	0.0042684	1.02022
N-Acetylglutamic acid	0.350034	0.13974	1.3247	6.3609e-06	1.23262
L-Serine	3.14543	1.39898	1.1689	0.0033865	1.0274
9,10-DHOME	0.103631	0.218765	-1.0779	0.0012833	1.05984
gamma-Aminobutyric acid	45.8395	98.0827	-1.0974	0.0017432	1.08528
L-Isoleucine	16.3757	40.1514	-1.2939	0.0080036	1.01943
Metanephrine	2.06237	5.34175	-1.373	0.0042797	1.01236
2-Ketobutyric acid	1.35823	3.5299	-1.3779	0.0047801	1.00658
N,N-Diethyl-m-toluamide	0.251196	0.698437	-1.4753	2.7363e-06	1.24452
Guanosine-5-triphosphate	0.280507	0.858536	-1.6138	0.0039574	1.04276
18-Hydroxycorticosterone	0.403204	1.27082	-1.6562	0.002875	1.02116
Oxoglutaric acid	132.197	417.855	-1.6603	5.4869e-06	1.27407
Fructose 1,6-bisphosphate	10.0596	32.3895	-1.687	2.9928e-05	1.20505
Eicosadienoic acid	0.115459	0.373986	-1.6956	2.3792e-05	1.20829
Isovaleric acid	1.05115	3.44682	-1.7133	0.00087071	1.10877
Choline	151.697	499.12	-1.7182	3.1537e-06	1.253
Methyl beta-D-galactoside	1.05303	3.68537	-1.8073	5.5646e-07	1.26322
Sclareol	0.130137	0.459107	-1.8188	0.0027123	1.04375
Hydrogen phosphate	0.450565	1.58965	-1.8189	9.9558e-05	1.17747
Linoleic acid	0.0885431	0.31248	-1.8193	0.0012373	1.16459
Dimethylglycine	26.3664	94.5987	-1.8431	2.0545e-06	1.25729
Arachidic acid	4.97295	18.1169	-1.8652	6.3285e-05	1.19457
Lactate	1.51992	5.63387	-1.8901	9.7723e-05	1.18614
4-Quinolinecarboxylic acid	0.49219	1.82618	-1.8915	0.00013206	1.21951
Trehalose 6-phosphate	0.242478	0.919106	-1.9224	4.4603e-05	1.19514
Dibutyl phthalate	0.0535476	0.204311	-1.9319	9.1514e-06	1.23889
13-L-Hydroperoxylinoleic acid	0.157895	0.60856	-1.9464	0.00034391	1.1377
12,13-DHOME	0.378748	1.51994	-2.0047	1.3167e-05	1.24777
Nonadecanoic acid	0.155436	0.624319	-2.006	0.00022278	1.19854
Retinol	0.629662	2.5934	-2.0422	0.0014499	1.10938
3-Dehydroshikimate	4.99147	21.0311	-2.075	1.5812e-07	1.27861
13S-hydroxyoctadecadienoic acid	0.521179	2.19821	-2.0765	0.00062606	1.16749
Dihydrothymine	5.31544	22.6703	-2.0925	0.012118	1.00053
trans-trans-Muconic acid	2.65599	11.3359	-2.0936	0.00012361	1.16763
Heptanoic acid	0.944914	4.03643	-2.0948	9.8431e-08	1.27905
Maltol	14.8703	65.1249	-2.1308	0.00053752	1.11046
Chenodeoxycholic acid	0.0214968	0.0969289	-2.1728	0.00023975	1.15769
Oleic acid	132.009	615.25	-2.2205	1.2592e-06	1.25536
3-Sulfinylpyruvic acid	1.87184	8.81428	-2.2354	9.0714e-07	1.26068
6Z-Octadecenoic acid	2.96361	14.0537	-2.2455	4.1491e-06	1.25684
5-Hydroxyindoleacetic acid	4.07811	19.4067	-2.2506	1.3788e-08	1.28501
3-Hydroxymethylglutaric acid	68.1385	324.534	-2.2518	1.0553e-06	1.26209
5-Aminopentanal	0.616516	2.94921	-2.2581	3.2803e-06	1.25174
Erucic acid	291.579	1398.01	-2.2614	8.0687e-05	1.22001
21-Hydroxypregnenolone	3.4727	17.0014	-2.2915	7.727e-06	1.21675
Pregnanediol	7.81832	39.1889	-2.3255	3.8643e-05	1.20203
Traumatic Acid	0.557938	2.80512	-2.3299	0.00069614	1.11017
LysoPA160/00	0.412046	2.11091	-2.357	0.0022321	1.04835
Mannitol	38.2243	197.252	-2.3675	6.4668e-06	1.24169
17a-Hydroxypregnenolone	0.392804	2.03353	-2.3721	1.8977e-05	1.23944
Deoxyadenosine	0.503319	2.64243	-2.3923	5.3917e-06	1.23331
N-Acetyl-D-glucosamine	0.312803	1.6444	-2.3942	8.7923e-07	1.26427
6beta-Hydroxytestosterone	1.0459	5.55092	-2.408	5.3315e-05	1.18134
Succinic acid	2.09955	11.6486	-2.472	0.0026134	1.07461
17a-Estradiol	1.29754	7.20617	-2.4735	0.00032414	1.1237
all-trans-Retinoic acid	0.315783	1.76664	-2.484	0.0082221	1.01312
Deoxycholic acid	0.937738	5.33051	-2.507	0.00098464	1.16306
dAMP	0.336869	1.9529	-2.5354	5.4923e-06	1.25666
Acetylcholine chloride	15.6924	94.2999	-2.5872	2.3539e-07	1.27443
3-2-Hydroxyphenylpropanoic acid	0.226727	1.37911	-2.6047	4.1811e-05	1.21132
Vanillylmandelic acid	1.06505	6.50615	-2.6109	0.0010048	1.09656
O-Ureido-L-serine	0.272583	1.6761	-2.6203	0.00044699	1.1902
7-Dehydrodesmosterol	0.0985837	0.615965	-2.6434	0.0025031	1.0421
Ethirimol	1.26094	8.18067	-2.6977	5.3259e-05	1.23849
Riboflavin	5.56298	37.4593	-2.7514	1.4333e-06	1.2518
R-2-O-Sulfolactate	0.47492	3.20667	-2.7553	0.0038956	1.00229
Tetracosanoic acid	0.356055	2.42599	-2.7684	0.00012097	1.20914
Melatonin	0.45364	3.15349	-2.7973	3.0854e-05	1.22303
Pyridoxine	0.421493	2.97353	-2.8186	4.2975e-06	1.25035
Cytidine	1.17237	8.29975	-2.8236	7.0781e-07	1.28521
Acetylphosphate	7.89459	56.8033	-2.847	0.0023938	1.04804
Mesaconate	0.822709	5.93274	-2.8502	0.00018542	1.19938
Cytosine	3.31214	24.5517	-2.89	1.3892e-06	1.25329
Acetylcysteine	0.179064	1.33089	-2.8938	0.00025914	1.13875
Isoliquiritigenin	0.309059	2.30259	-2.8973	0.0029738	1.10083
Prostaglandin E1	0.486489	3.68401	-2.9208	0.0023759	1.07997
Indoleacetaldehyde	7.6511	58.0575	-2.9237	0.00021372	1.20521
Azelaic acid	0.216313	1.67975	-2.9571	6.8334e-07	1.26023
Ribose 1,5-bisphosphate	0.256078	2.03434	-2.9899	0.00016138	1.19796
Nalbuphine	0.37739	3.04369	-3.0117	0.0020099	1.07907
D-Galactose	19.7358	175.273	-3.1507	5.304e-07	1.26292
Perindopril	0.0687064	0.612283	-3.1557	0.0011223	1.08864
Guanidinosuccinic acid	2.92635	26.4733	-3.1774	1.1409e-07	1.28614
Imidazole-4-acetaldehyde	0.491033	4.63812	-3.2396	0.00032519	1.17404
Epsilon-caprolactam	0.884584	8.69588	-3.2973	0.00061438	1.11545
gamma-Glutamyl-beta-cyanoalanine	0.751782	7.50096	-3.3187	4.007e-06	1.25057
Astragalin	0.141039	1.41949	-3.3312	9.5159e-06	1.25972
Daidzin	0.0972994	0.982993	-3.3367	0.00019726	1.193
beta-Sitosterol	0.0709618	0.719976	-3.3428	0.0017451	1.12103
Urocanic acid	0.0832816	0.865942	-3.3782	0.0011296	1.12293
N-Butyryl-L-homoserine lactone	0.0837186	0.926689	-3.4685	3.8082e-05	1.24418
S-4-Hydroxymandelate	2.78494	31.3292	-3.4918	1.9975e-05	1.21421
myo-Inositol	17.509	198.727	-3.5046	0.0013816	1.09948
6-Phosphogluconic acid	0.171866	2.13502	-3.6349	0.0004648	1.12648
S-Adenosylmethionine	1.30264	16.88	-3.6958	2.4038e-06	1.26167
3,4-Dihydroxymandelic acid	0.108577	1.42106	-3.7102	5.806e-07	1.28618
Alpha-dimorphecolic acid	0.274026	3.63312	-3.7288	1.0243e-09	1.30056
Homovanillic acid	0.154913	2.12344	-3.7769	0.00025956	1.12793
16-Hydroxy hexadecanoic acid	0.0683528	1.00705	-3.881	0.00068682	1.09258
Lumichrome	0.770281	11.5004	-3.9002	0.004993	1.06319
Stigmasterol	0.516845	8.27314	-4.0006	5.1284e-05	1.23562
Procollagen 5-hydroxy-L-lysine	0.27466	4.42663	-4.0105	0.0019428	1.05453
Taurine	8.0342	131.647	-4.0344	2.0315e-07	1.27599
Porphobilinogen	0.210025	3.4538	-4.0396	6.7114e-06	1.27728
D-Ribose	2.82695	52.8778	-4.2253	2.9167e-05	1.21403
O-Phosphoethanolamine	0.236049	4.69749	-4.3147	0.0022751	1.10489
Argininosuccinic acid	0.00638275	0.131055	-4.3599	0.0035484	1.12223
D-Glyceraldehyde 3-phosphate	0.216893	4.97348	-4.5192	1.5527e-06	1.28381
Epiandrosterone	0.0793583	1.86439	-4.5542	0.00020339	1.20973
Vidarabine	0.0647341	2.11216	-5.0281	0.0029187	1.12989
Formononetin	0.370478	24.9677	-6.0745	5.4649e-06	1.25204
Fucoxanthin	0.024566	2.36071	-6.5864	2.9713e-06	1.2418
3-Methylbutanamine	0.694058	94.3482	-7.0868	0.0085602	1.03401
