# Supplementary material for: Metabolic response of the sea cucumber Apostichopus japonicus during the estivation-arousal cycles
Source: Frontiers journal article supplement (doi:10.3389/fmars.2022.980221), 2022-08-08
Supplement: Table_3.XLSX [file Table_3.XLSX]

## Sheet: AA VS NA
	AA-Mean	NA-Mean	log2(FC)	raw.pval	vip
3alpha,7alpha-Dihydroxy-12-oxo-5beta-cholanate	0.00864379	0.000159035	5.7642	0.013723	1.79773
UMP	0.0388031	0.000908272	5.4169	0.00040369	2.2322
Niacinamide	10.9253	1.47712	2.8868	0.0023058	2.23871
Ectoine	132.179	28.2409	2.2266	1.5583e-05	2.38795
Aflatoxin B1	3.73195	0.841015	2.1497	0.001338	2.12366
Mesaconate	24.1826	5.77052	2.0672	0.047068	1.58372
Aminosalicylic Acid	2.0952	0.551205	1.9264	0.0062388	2.04636
Procaine	4.96748	1.31691	1.9154	0.0077903	1.8718
R-mandelic Acid	14.3037	4.38874	1.7045	0.0033522	1.94976
1H-Indol-3-yl-N-methylmethanamine	20.7499	7.40087	1.4873	0.017775	1.89584
3-Hydroxyanthranilic acid	8.44055	3.1801	1.4083	0.0028475	2.11222
9Z,11E,13E-Octadecatrienoic acid	1.01195	0.388344	1.3817	0.011169	1.94404
Sorbitol	59.0458	22.6615	1.3816	0.028712	1.59697
Cis-zeatin	1.40082	0.549752	1.3494	0.045563	1.54592
1-Arachidonoylglycerol	10.4944	4.15625	1.3363	0.032958	1.71467
trans-Cinnamate	18.3455	7.55263	1.2804	0.046062	1.64546
Cellobiose	0.292138	0.121168	1.2696	0.024686	1.61928
p-Aminobenzoic acid	291.055	126.292	1.2045	0.0043963	2.05921
L-Carnitine	7.80177	3.55783	1.1328	0.0294	1.71268
2,3-Butanediol	61.1318	28.5468	1.0986	0.04896	1.51983
L-Glutamic acid	7.72478	3.71587	1.0558	0.049063	1.46647
all-trans-Retinoic acid	0.736302	1.72722	-1.2301	0.036902	1.63689
LysoSMd181	0.0101506	0.0266507	-1.3926	0.0016599	2.07556
Phenylacetylglutamine	0.00857507	0.0232593	-1.4396	0.0079385	1.98964
2-Pyrocatechuic acid	0.380106	1.13049	-1.5725	0.044155	1.51462
16-Hydroxy hexadecanoic acid	0.269812	0.968924	-1.8444	0.037749	1.57281
Nalbuphine	0.791833	2.94126	-1.8932	0.014814	1.84141
13S-HPOT	0.229839	0.859613	-1.9031	0.015372	1.77424
Alpha-Tocotrienol	0.0282223	0.106931	-1.9218	0.0021741	2.17297
Succinic acid	2.44741	11.3444	-2.2127	0.0068695	1.87239
Perindopril	0.119606	0.585077	-2.2903	0.012443	1.76675
N,N-Dimethylsphingosine	0.254091	1.32698	-2.3847	0.027114	1.77632
L-Theanine	0.12267	0.644523	-2.3934	0.012917	1.92524
Vidarabine	0.320647	2.05473	-2.6799	0.035658	1.63737
Formononetin	2.82589	24.4142	-3.1109	0.00036708	2.23882
Isoalantolactone	0.0195601	0.463405	-4.5663	0.022076	1.84547
Saccharopine	0.000878827	0.145895	-7.3751	0.035826	1.67617
